# Supplementary material for: Vibrational spectra and physico-chemical properties of astrophysical analogs
Source: Royal Society of Chemistry journal article supplement (doi:10.1039/c7cp04695b), 2017-01-01
Supplement: c7cp04695b1.pdf [file c7cp04695b1.pdf]

Supplementary Material

Table S1. Wavenumbers ( $\text{cm}^{-1}$ ) of free OH and hydrogen bonded OH stretching modes of water as a function of the amorphous solid density ( $\text{g cm}^{-3}$ ).

| $\rho$ | $\tilde{\nu}$ (free-OH) |        |        | $\tilde{\nu}$ (inter) | $\tilde{\nu}$ (mixed) | $\tilde{\nu}$ (intra) |
|--------|-------------------------|--------|--------|-----------------------|-----------------------|-----------------------|
| 0.40   | 3671.1                  | 3668.2 | 3662.7 | 3341.9                | 3217.2                | 3312.5                |
| 0.50   | 3692.4                  | 3688.1 | 3672.7 | 3381.4                | 3353.5                | 3270.4                |
| 0.60   | 3691                    | 3686.1 | 3675.6 | 3286                  | 3249.8                | 3115.9                |
| 0.75   | 3675.9                  | 3670.9 | 3662.8 | 3166                  | 3188                  | 3008.2                |
| 1.00   | 3681.4                  | 3659.6 | 3657.1 | 3122                  | 3096.5                | 2917.3                |
| 1.18   | 3676.3                  | 3670.4 | 3648.4 | 3138.4                | 3107.9                | 2928.2                |
| 1.60   | 3719.8                  | 3655.4 | 3650.9 | 3022.2                | 3046.3                | 2798.8                |
| 1.98   | 3695.8                  | 3645.5 | 3590.3 | 3175.9                | 3057.0                | 2876.8                |

Table. S2. Intensities ( $\text{km mol}^{-1}$ ) corresponding to free OH and hydrogen bonded OH stretches of water as a function of the amorphous solid density ( $\text{g cm}^{-3}$ ).

| $\rho$ | $\tilde{\nu}$ (free-OH) |     |     | $\tilde{\nu}$ (inter) | $\tilde{\nu}$ (mixed) | $\tilde{\nu}$ (intra) |
|--------|-------------------------|-----|-----|-----------------------|-----------------------|-----------------------|
| 0.40   | 113                     | 191 | 195 | 785                   | 53                    | 1006                  |
| 0.50   | 72                      | 151 | 78  | 150                   | 209                   | 2268                  |
| 0.60   | 124                     | 129 | 209 | 241                   | 587                   | 3048                  |
| 0.75   | 94                      | 174 | 228 | 584                   | 544                   | 3346                  |
| 1.00   | 86                      | 298 | 130 | 741                   | 827                   | 3400                  |
| 1.18   | 7                       | 227 | 170 | 1415                  | 160                   | 3124                  |
| 1.60   | 137                     | 248 | 193 | 1568                  | 1305                  | 3193                  |
| 1.98   | 246                     | 352 | 411 | 373                   | 1830                  | 2083                  |

Table S3. Estimated wavenumber and intensity of the stretching modes of  $\text{CH}_4$  and  $\text{N}_2$  as function of the density of the sample. Activation of the forbidden  $\nu_1$  mode of  $\text{CH}_4$  is especially significant for the highest density structures. Wavenumbers in  $\text{cm}^{-1}$ , intensities in brackets in  $\text{km mol}^{-1}$ , density in  $\text{g cm}^{-3}$ .

| $\rho$ | $\nu_1 \text{ CH}_4$ | $\nu_3 \text{ CH}_4$ | $\text{N}_2$ |
|--------|----------------------|----------------------|--------------|
| 1.98   | 3041.7(27)           | 3190.9(4)            | 2041(3)      |
|        |                      | 3246.5(15)           | 2047(3)      |
|        |                      | 3271.2(6)            | 2051(1)      |
| 1.60   | 2985.3(78)           | 3114.6(32)           | 2030(1)      |
|        |                      | 3149.5(4)            | 2037(1)      |
|        |                      | 3172.9(30)           | 2054(5)      |
| 1.18   | 2931.0(18)           | 3048.4(23)           | 2038(0.3)    |
|        |                      | 3067.3(7)            | 2041(0.2)    |
|        |                      | 3097.1(41)           | 2044(0.3)    |
| 1.00   | 2919.1(10)           | 3045.5(32)           | 2036(2)      |
|        |                      | 3050.6(15)           | 2040(0)      |
|        |                      | 3056.6(6)            | 2042(1)      |
| 0.75   | 2910.7(8)            | 3036.5(15)           | 2034(0)      |
|        |                      | 3039.1(10)           | 2038(1)      |
|        |                      | 3049.1(6)            | 2041(1)      |
| 0.60   | 2909.9(4)            | 3032.4(24)           | 2036(0)      |
|        |                      | 3039.2(11)           | 2039(0)      |
|        |                      | 3047.0(9)            | 2039(0)      |
| 0.50   | 2917.5(2)            | 3044.7(16)           | 2035(0)      |
|        |                      | 3047.0(14)           | 2039(0)      |
|        |                      | 3048.1(17)           | 2039(0)      |
| 0.40   | 2908.4(11)           | 3026.1(25)           | 2035(0)      |
|        |                      | 3041.1(16)           | 2038(1)      |
|        |                      | 3047.8(10)           | 2039(0)      |
| 0.15   | 2914.6(1)            | 3036.4(20)           | 2036(0)      |
|        |                      | 3043.1(18)           | 2037(0)      |
|        |                      | 3052.0(4)            | 2038(0)      |

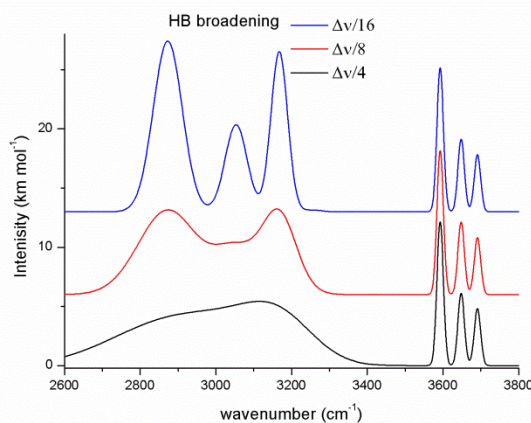

Fig. S1. Representation of the predicted spectrum of the sample with density  $1.0 \text{ g cm}^{-3}$ , using Gaussian functions of different HWHM for the HB modes, below  $3400 \text{ cm}^{-1}$ . The widths are calculated from the redshift  $\Delta\nu$  of each mode from the theoretical value of a free O-H stretching, i.e.  $3600 \text{ cm}^{-1}$ , by applying an arbitrary ratio as indicated in the figure.
